# Supplementary material for: Isoform requirement of clustered protocadherin for preventing neuronal apoptosis and neonatal lethality
Source: PubMed Central journal article supplement (PMC9793319; doi:10.1016/j.isci.2022.105766), 2022-12-08
Supplement: mmc1.pdf [file mmc1.pdf]

**iScience, Volume 26**

**Supplemental information**

**Isoform requirement of clustered protocadherin  
for preventing neuronal apoptosis  
and neonatal lethality**

**Hiroaki Kobayashi, Kenji Takemoto, Makoto Sanbo, Masumi Hirabayashi, Takahiro Hirabayashi, Teruyoshi Hirayama, Hiroshi Kiyonari, Takaya Abe, and Takeshi Yagi**

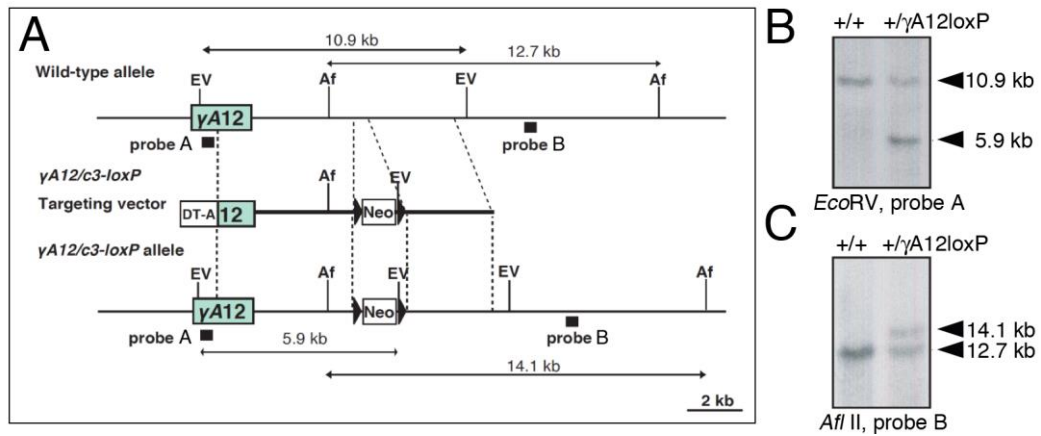

**Figure S1. Design of a  $\gamma A12/C3-loxP$  targeting construct, related to Figure 1.**

(A) Diagram showing the  $\gamma A12/C3-loxP$  targeting constructs. EV: EcoRV, Af: AflIII. Filled triangles represent *loxP* sites. (B) Southern blot of homologous recombinant ES cells digested by EcoRV, with probe A. (C) Southern blot of homologous recombinant ES cells digested by AflIII, with Probe B.

**Table S1. List of oligonucleotides, related to STAR Methods.**

Probe sequences used for southern blot.

| Name    | Sequence: (+)-strand                                                                                                                                                                                                                                                                                                                                                     |
|---------|--------------------------------------------------------------------------------------------------------------------------------------------------------------------------------------------------------------------------------------------------------------------------------------------------------------------------------------------------------------------------|
| Probe A | CAGCGAAAGTTTTCAAGCTGGACAGTAACTTGGGGACAATATCAACAATAG<br>GGGAGCTGAATCATGAAGAATCGGGGTGCAACGACAACGCACCTGCGTTT<br>GCTCGGTCCGAGTACCGCGTGAGCGTGCGGGGAGAACGTGGCTGTGGGCA<br>CTCAGCTGCTGCTGGTCAACGCCACCGACCCAGACGAAGGCGCCAATGCG<br>GAAGTGATCTATTCTTCCGGTACGTGGACGACAAGGTCTACGAGATGGAG<br>GTGCAAGCTACAGATAACGCGGGGATATTCTGCACGGGCCAAGGTCCTGGT<br>CACAGTTC                           |
| Probe B | CCTGTGAAACAGCTCCGTCATGACAGCTAGCTTCCATCAGACCAAGCAAAG<br>GAGGGAGCCAGAGAGGGAAAATCTGATAAATGCTTCAATGCTTATGTGAGC<br>CCCAATTTGAAGTGACACGCGTTACTACAAATATATTAGATCATTACAAAC<br>AAAATCATTGCTCCTGCCACACTCAGAAGAGATGAATTTAGTCCACTTA<br>TGATGGTTTTCTGTGTTCTGAGAGGAAACTCCCCTTCTCTTGTCTATTTCAT<br>GTATGGTCGTGGGTCGTGCATCTGTTACAGTAAGATTATTCCATTACTGC<br>TGTATTTTATTTTATCTCAAAGTCTCTAGATT |

Primers used for genotyping the mutant mice

| Name                     | Sequence              | Purpose          |
|--------------------------|-----------------------|------------------|
| $\alpha$ 1-232F (F1)     | TGCAGACCATTGCTGGATGT  | Pcdh (common)    |
| gA12C3 intron 4846R (R2) | GCACGTTCCAGGGCGTACATA | Pcdh (TC allele) |
| Pcdh $\alpha$ 1R1 (R1)   | CAATGTCTGCGTCCACGGCG  | Pcdh (WT allele) |
| 115F                     | GCGCGCCAAAGCTTGCATGC  | Taf7-tg          |
| 115R                     | CTCTCCCTATAGTGAGTC    | Taf7-tg          |

Primers used for RT-PCR/real-time RT-PCR

| Name              | Sequence                       | Purpose                |
|-------------------|--------------------------------|------------------------|
| CR2-3'F           | CAGTGGCCAACAGTATCCAG           | Pcdh $\alpha$ CR       |
| C3-5'             | AGGTCCAGCTGTTGCTGTTG           | Pcdh $\alpha$ CR       |
| Pcdhb3 real F     | CTCTCTTGGTCTGGTAAACTTC         | Pcdh $\beta$ 3         |
| Pcdhb3 real R     | GGGATACCATGGCTTGAATTAAGT       | Pcdh $\beta$ 3         |
| Pcdhb21 real F    | AAAGCCTGTCTCCCAACCTTG          | Pcdh $\beta$ 21        |
| Pcdhb21 real R    | CAGGAACCATGATGAGAGTCAAC        | Pcdh $\beta$ 21        |
| PcdhgA3 real F    | CTCAAGATTTACTTGAAACGAAAGAAGACC | Pcdh $\gamma$ A3       |
| PcdhgB7 real F    | GGCACTGTTGGCTAGTATTTTAACTC     | Pcdh $\gamma$ B7       |
| PcdhgC3 real F    | CCTGTGTTCTATAGACAGGTGTTG       | Pcdh $\gamma$ C3       |
| PcdhgC4 real F    | GTCCACCCTCTGATCTTCTC           | Pcdh $\gamma$ C4       |
| PcdhgC5 real F    | GTTCCCGCTCTAGTACGCTG           | Pcdh $\gamma$ C5       |
| Pcdhg constant R3 | CAGGTGCCAGTTTCATCACC           | Pcdh $\gamma$ (common) |
| Gamma cp1 real F  | CTGGCGTTTCTCTCAAGCCC           | Pcdh $\gamma$ CR       |
| Pcdhg constant R2 | CATGGCTTGACGATCTCTG            | Pcdh $\gamma$ CR       |
| GapdhF3 770-789bp | AATGTGTCCGTCGTGGATCT           | GAPDH                  |
| GapdhR3 897-916bp | GTTGAAGTCGCAGGAGACAA           | GAPDH                  |

Primers used for *in situ* hybridization RNA probes

| Name                     | Sequence                              | Purpose          |
|--------------------------|---------------------------------------|------------------|
| Pcdh $\alpha$ 12 forward | CGGGATCCCCTGAAACCAACAAAAC             | Pcdh $\alpha$ 12 |
| Pcdh $\alpha$ 12 reverse | CCGCTCGAGGACCTCTGGTGCATTATCA          | Pcdh $\alpha$ 12 |
| Pcdh $\beta$ 22 forward  | AAGCTTCGTTGACATCCACCACCTG             | Pcdh $\beta$ 22  |
| Pcdh $\beta$ 22 reverse  | GGCCCCGCCGCTACTTTGTGATGG              | Pcdh $\beta$ 22  |
| Pcdh $\gamma$ A3 forward | TAGTGGTACCTGTCTCGTCAGCTTTAACATCCTTGTG | Pcdh $\gamma$ A3 |
| Pcdh $\gamma$ A3 reverse | TAGTGAGCTCCCCATCCGTGGCTCTTAGAC        | Pcdh $\gamma$ A3 |
| Pcdh $\gamma$ C3 forward | AACAATCCCTCTTTCCCACCGG                | Pcdh $\gamma$ C3 |
| Pcdh $\gamma$ C3 reverse | ATGCGCTCCTTCGGGATTGG                  | Pcdh $\gamma$ C3 |
| Pcdh $\gamma$ C4 forward | TAGTGGTACCAGGCTGCAGGTCGCTGG           | Pcdh $\gamma$ C4 |
| Pcdh $\gamma$ C4 reverse | TAGTACTAGTTGGTAAGTGGTCGGGAATCCG       | Pcdh $\gamma$ C4 |
